# Supplementary material
Source: HighWire-hosted journal article supplement (https://bmjopen.bmj.com/content/13/12/e074457)
Supplement: inline-supplementary-material-3 [file inline-supplementary-material-3.pdf]

Supplementary Table 3 – Radiography

| Plain radiography              |                                                                                                                                                                                                                                                        |
|--------------------------------|--------------------------------------------------------------------------------------------------------------------------------------------------------------------------------------------------------------------------------------------------------|
| <b>AC Joint osteoarthritis</b> | Abreu classification<br>Grade 0 (No osteoarthritis)<br>Grade 1 (Mild osteoarthritis)<br>Grade 2 (Moderate osteoarthritis)<br>Grade 3 (Severe osteoarthritis)                                                                                           |
| <b>Subacromial space</b>       | Gill et al.<br>Grade 1 (Normal)<br>Grade 2 (Mild narrowing)<br>Grade 3 (Moderate narrowing)<br>Grade 4 (Severe narrowing / acetabularisation)                                                                                                          |
|                                | SA space (minimum height in mm)                                                                                                                                                                                                                        |
| <b>Calcific tendinosis</b>     | Bosworth classification<br>Grade 0 (None)<br>Grade 1 (Tiny, barely visible)<br>Grade 2 (less than 15mm)<br>Grade 3 (more than 15mm)                                                                                                                    |
| <b>Scapula / acromion</b>      | Acromial spur (Yes/No)                                                                                                                                                                                                                                 |
|                                | Os acromiale (Yes/No)                                                                                                                                                                                                                                  |
|                                | Bigliani classification<br>Type 1<br>Type 2<br>Type 3                                                                                                                                                                                                  |
|                                | Critical shoulder angle                                                                                                                                                                                                                                |
|                                | Acromion index                                                                                                                                                                                                                                         |
|                                | Acromion slope                                                                                                                                                                                                                                         |
|                                | Lateral acromion angle                                                                                                                                                                                                                                 |
| <b>GH Joint osteoarthritis</b> | Gill et al.<br>Grade 1 (No arthritis)<br>Grade 2 (Mild arthritis)<br>Grade 3 (Moderate arthritis)<br>Grade 4 (Severe arthritis)                                                                                                                        |
|                                | Samilson Prieto Allain<br>Grade 0 (No osteoarthritis)<br>Grade 1 (Inferior humeral exostosis 1-3 mm)<br>Grade 2 (Inferior humeral exostosis 4-7 mm)<br>Grade 3 (Inferior humeral exostosis > 7mm)<br>Grade 4 (Narrowing of the GH joint and sclerosis) |
| <b>Other</b>                   | Hill Sachs (Yes/No)                                                                                                                                                                                                                                    |
|                                | Previous proximal humerus fracture (Yes/No)                                                                                                                                                                                                            |
|                                | Bony Bankart lesion (Yes/No)                                                                                                                                                                                                                           |
|                                | Osteonecrosis (Yes/No)                                                                                                                                                                                                                                 |

AC= acromioclavicular, SA=subacromial, GH=glenohumeral
